# Supplementary material
Source: PubMed Central journal article supplement (PMC3719855)
Supplement: NIHMS408594-supplement-Supplementary_figures.pdf [file NIHMS408594-supplement-Supplementary_figures.pdf]

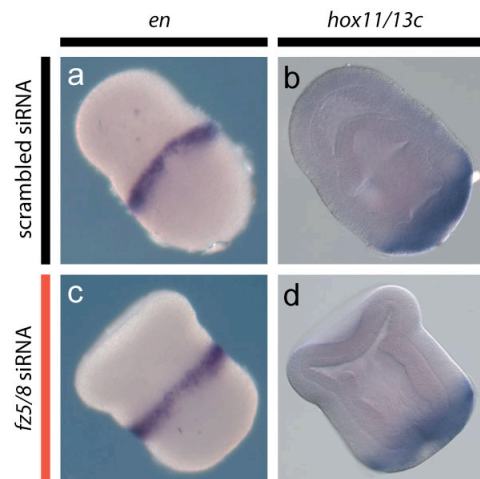

**Supplementary figure 1. *Fz5/8* siRNA injection does not affect expression of collar and trunk markers.**

**a, b**, expression of *en* (**a**) and *hox11/13c* (**b**) in embryos injected with a scrambled, control siRNA. **c, d**, expression patterns of *en* (**c**) and *hox11/13c* (**d**) are unaffected in embryos injected with *fz5/8* siRNA.

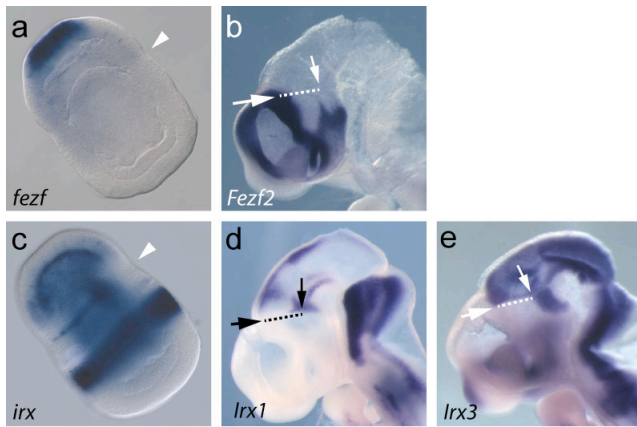

**Supplementary figure 2. Expression patterns for *S. kowalevskii* and mouse homologues of additional genes involved in *Shh* regulation at the ZLI.**

**a**, *fezf* is expressed in the *S. kowalevskii* anterior proboscis ectoderm. **b**, *Fezf2* expression in the mouse brain at E10.5. **c**, *irx* is expressed in anterior proboscis mesoderm, ventral proboscis-collar boundary ectoderm, collar-trunk boundary ectoderm, and collar endoderm in *S. kowalevskii*. **d**, **e**, mouse *Irx1* (**d**) and *Irx3* (**e**) are expressed in the diencephalon posterior to the ZLI with additional domains in the midbrain and hindbrain. Arrowheads mark the proboscis-collar boundary in hemichordates. In hemisected mouse heads, dashed lines indicate the ZLI with arrows additionally denoting its extent.

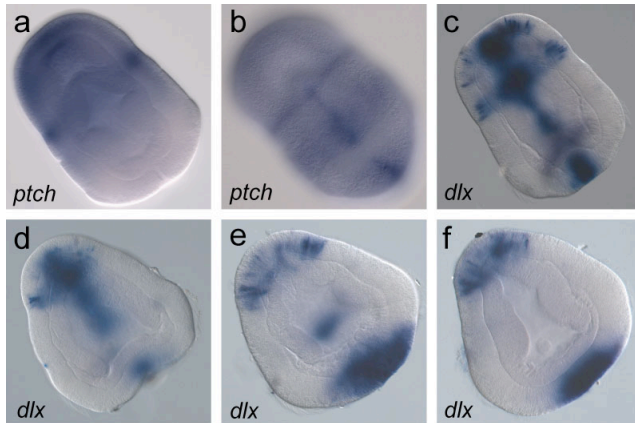

**Supplementary figure 3. *Ptch* expression in wild-type embryos and spectrum of phenotypes caused by *hh* siRNA.**

Images show optically cleared embryos oriented with anterior to top left. **a, b**, *ptch* expression with images focused through the embryo (**a**) or on the dorsal surface (**b**). Note expression in proboscis mesoderm and the ectodermal midline. **c**, *dlx* expression in an embryo injected with a scrambled, control siRNA. (**d-f**), *dlx* expression in embryos injected with *hh* siRNA. Milder phenotypes exhibit *dlx* downregulation in the apical ectoderm and proboscis base (**d**) while more severely affected embryos show progressive loss of the anterior proboscis and *dlx* dorsal midline expression (**e, f**).

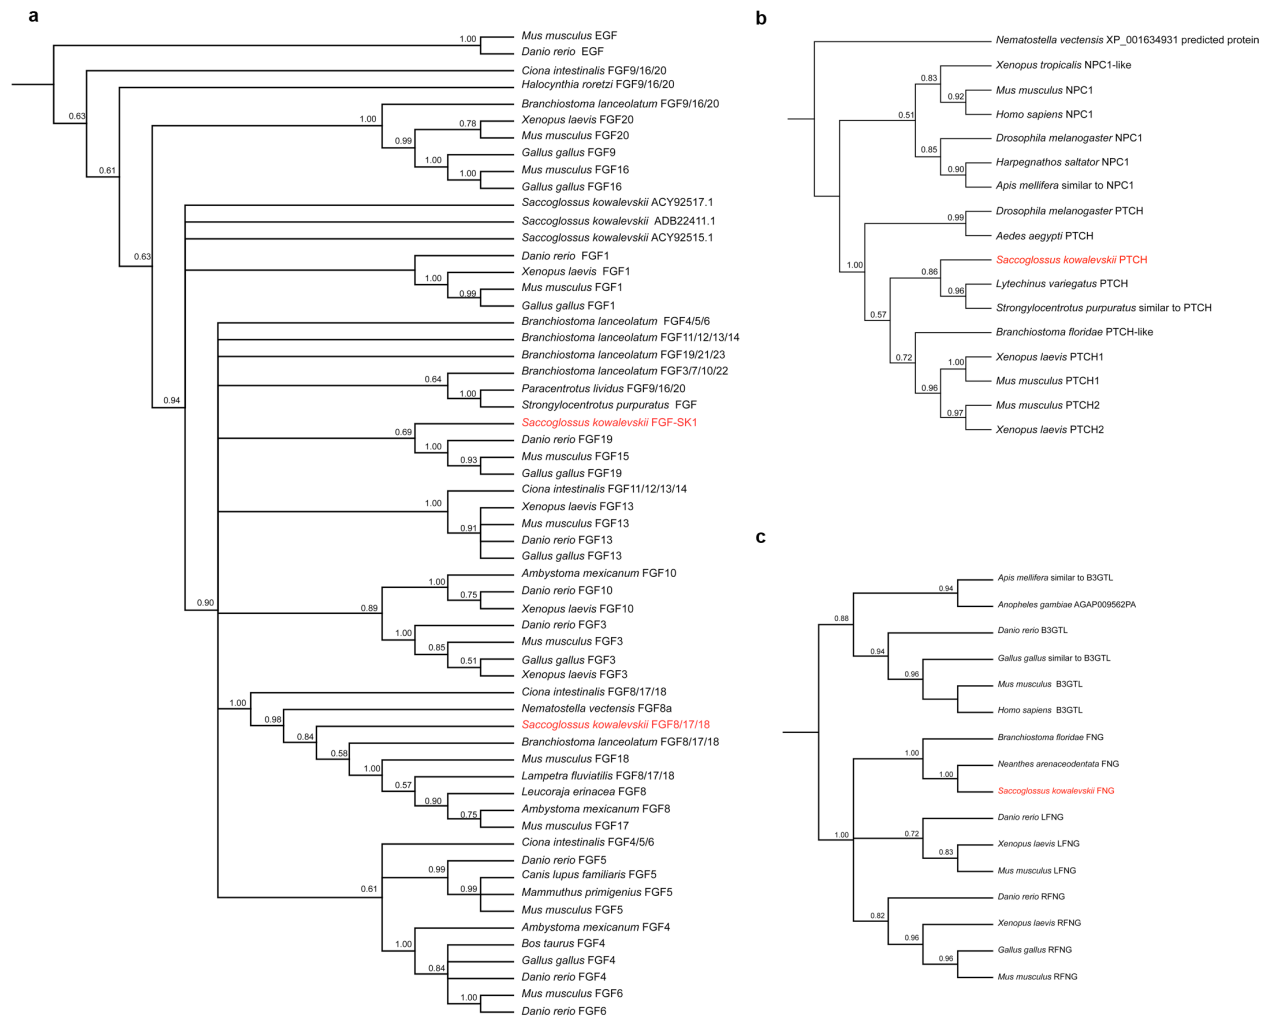

**Supplementary figure 4. Phylogenetic trees for *S. kowalevskii* FGFs, PTCH, and FNG.**

**a**, phylogenetic tree for *S. kowalevskii* FGFs. *S. kowalevskii* FGF8/17/18 was placed within a robustly supported FGF8/17/18 clade, but the placement of FGF-SK1 was unstable, and it could not be confidently assigned to any FGF subfamily. Putative PTCH (**b**) and FNG (**c**) homologues were placed within well-supported clades. Posterior probabilities are shown above each node.

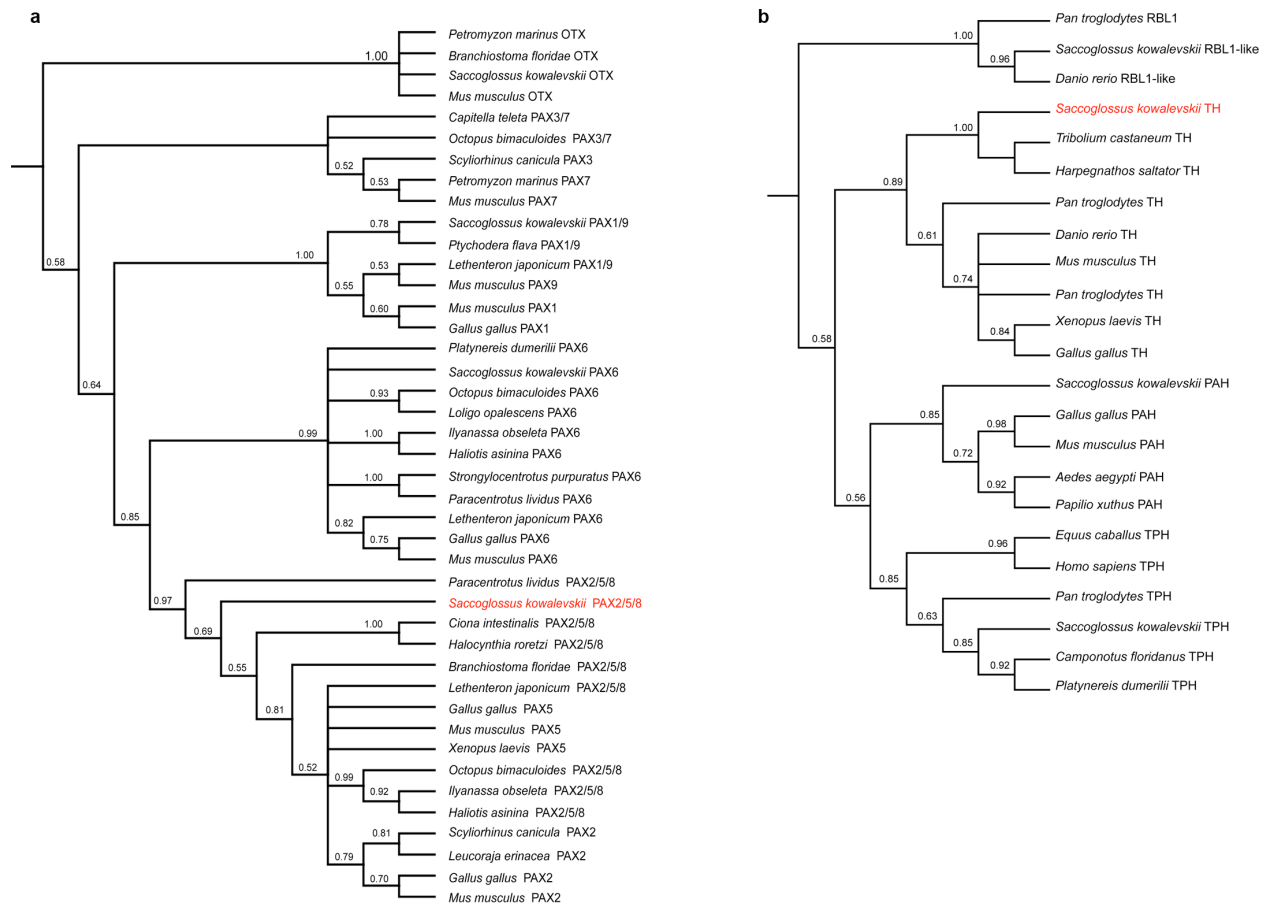

**Supplementary figure 5. Phylogenetic trees for *S. kowalevskii* PAX2/5/8 and TYROSINE HYDROXYLASE (TH).**

Putative *S. kowalevskii* PAX2/5/8 (**a**), and TH (**b**) homologues were placed within robustly supported clades that corroborated earlier predictions. Posterior probabilities are shown above each node.

**Supplementary table 1.** siRNA sequences.

| <b>Target gene</b>                | <b>Sense</b>          | <b>Antisense</b>      |
|-----------------------------------|-----------------------|-----------------------|
| <i><math>\beta</math>-catenin</i> | ACAUGCUGUUGUAAAUCUUuu | AAGAUUUACAACAGCAUGUuu |
| <i>fgf8/17/18</i>                 | AAAGCGGUACAAUUUAUGAtt | UCAUAAAUUGUACCGCUUUtt |
| <i>fgf8/17/18</i> scrambled       | GAGAAUACUGAACGUAUAtt  | UAUACGUUCAGUUUUUCUctt |
| <i>fz5/8</i>                      | GCUGAUACCUUCCGUGAAAtt | UUUCACGGAAGGUAUCAGCtt |
| <i>fz5/8</i> scrambled            | GCGUCCAUCGAUCAAGUAtt  | UACUUGAUCGAUGGAACGctt |
| <i>hh</i>                         | GGAGCGGACCGATTAATGAtt | UCAUUAAUCGGUCCGCUCctt |
| <i>hh</i> scrambled               | ACAAGATGGTAGGCGTGCctt | GGCACGCCUACCAUCUUGTtt |
| <i>otx</i>                        | CCGCCGAUAGCUGCUUAGAtt | UCUAAGCAGCUAUCGGCGGtt |

**Supplementary table 2.** *S. kowalevskii* gene accession numbers.

| <b>Gene</b>                       | <b>NCBI accession number</b> |
|-----------------------------------|------------------------------|
| <i><math>\beta</math>-catenin</i> | ACH73219.1                   |
| <i>dlx</i>                        | AAP79300.1                   |
| <i>en</i>                         | AAP79298.1                   |
| <i>fgf-Sk1</i>                    | ACY92516.1                   |
| <i>fgf8/17/18</i>                 | ADB22412.1                   |
| <i>fng</i>                        | JN084014.1                   |
| <i>foxa</i>                       | ACG76356.1                   |
| <i>foxg</i>                       | AAP79301.1                   |
| <i>gbx</i>                        | AAP79285.1                   |
| <i>hh</i>                         | ABD97267.1                   |
| <i>hox11/13c</i>                  | AAP79288.1                   |
| <i>otx</i>                        | AAP79293.1                   |
| <i>pax2/5/8</i>                   | ADB22664.1                   |
| <i>pax6</i>                       | AAP79294.1                   |
| <i>ptch</i>                       | ADB22662.1                   |
| <i>rx</i>                         | AAP79282.1                   |
| <i>sfrp1/5</i>                    | ACY92646.1                   |
| <i>six3</i>                       | AAP79281.1                   |
| <i>th</i>                         | ADB22647.1                   |
| <i>wnt1</i>                       | ACH68427.1                   |
| <i>wnt8</i>                       | ACY92691.1                   |
